# Supplementary figures and images for: Current and innovative methods for the diagnosis of COVID-19 infection (Review)
Source: PubMed Central journal article supplement — Int J Mol Med. 2021 Apr 12;47(6):100. doi: 10.3892/ijmm.2021.4933 (PMC8043662; doi:10.3892/ijmm.2021.4933), 2021-04-12

Figure S1. Rapid interpretation of the SARS-CoV-2 rapid antibody test.

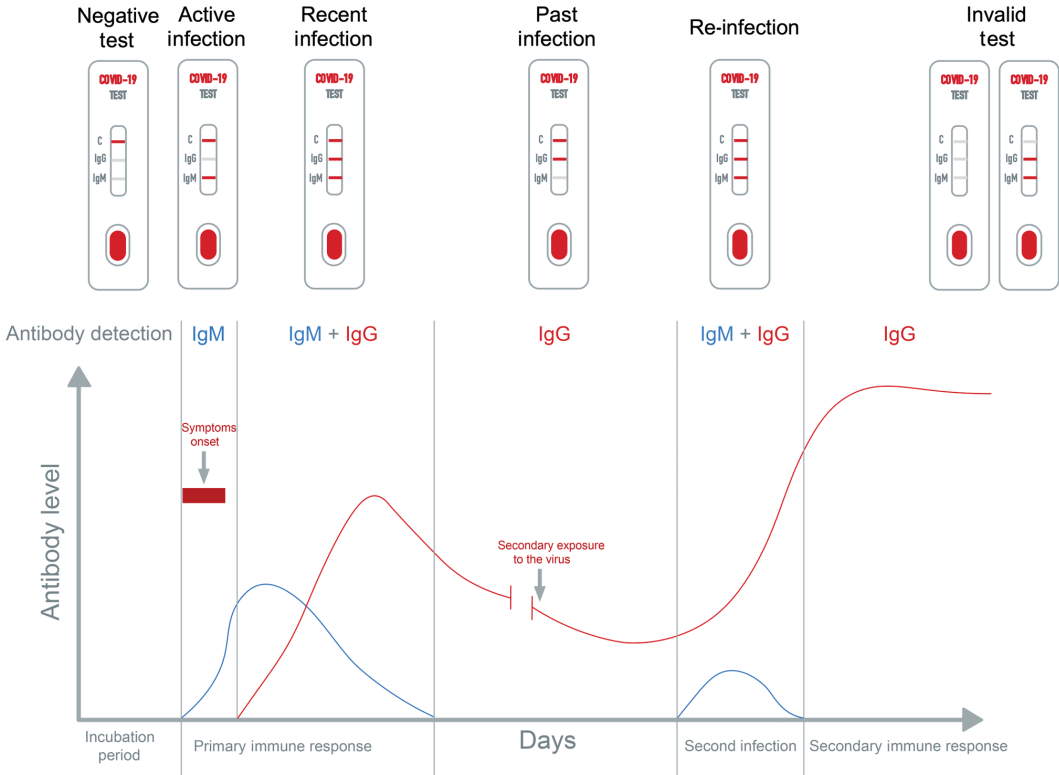

Supplement: Supplementary_Data1.pdf [file Supplementary_Data1.pdf]
